# Supplementary material
Source: PubMed Central journal article supplement (PMC3532592)

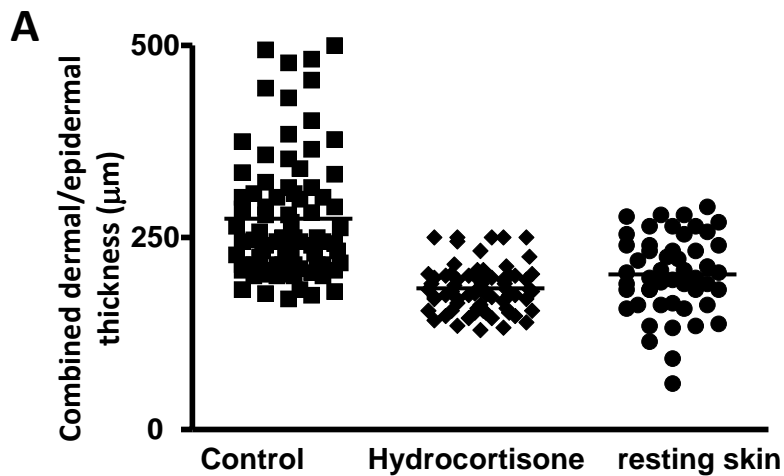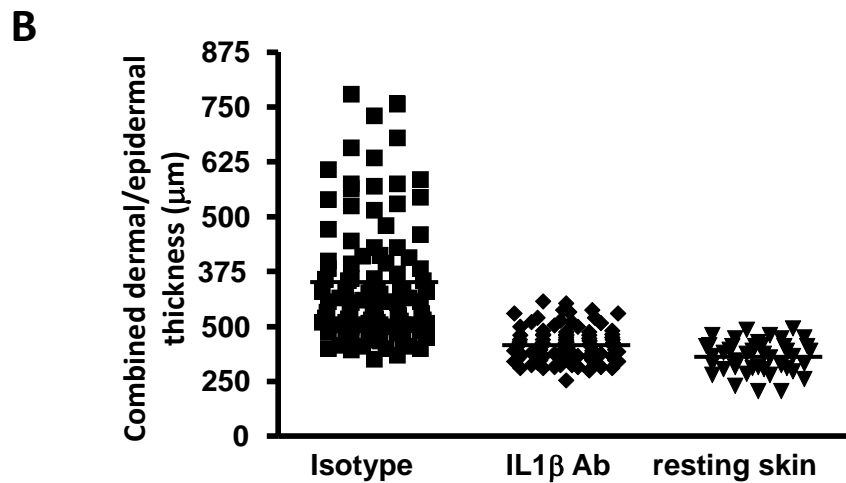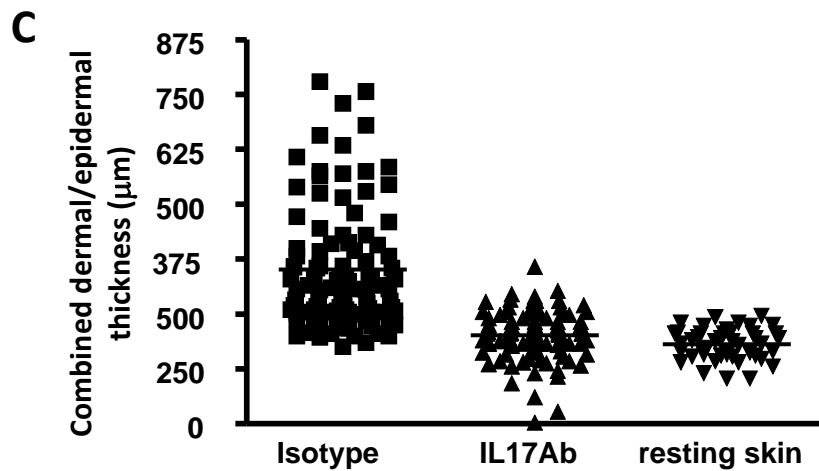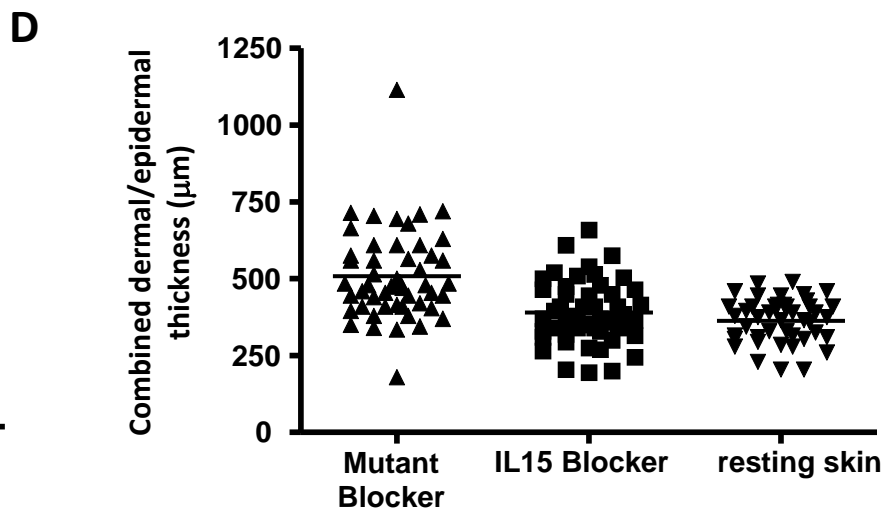

Supplement: mmc1.pdf [file mmc1.pdf]

**A**

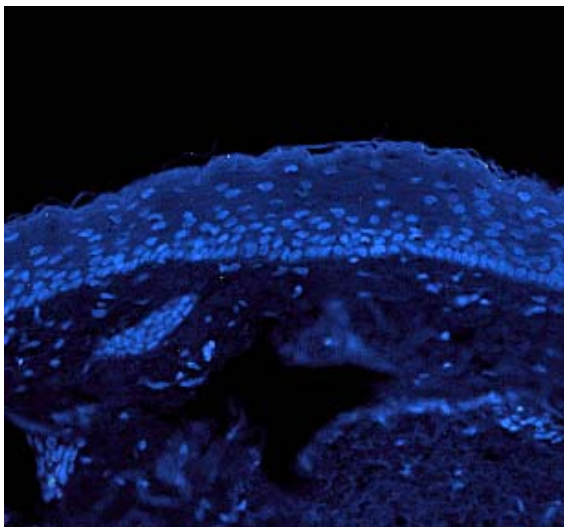

**B**

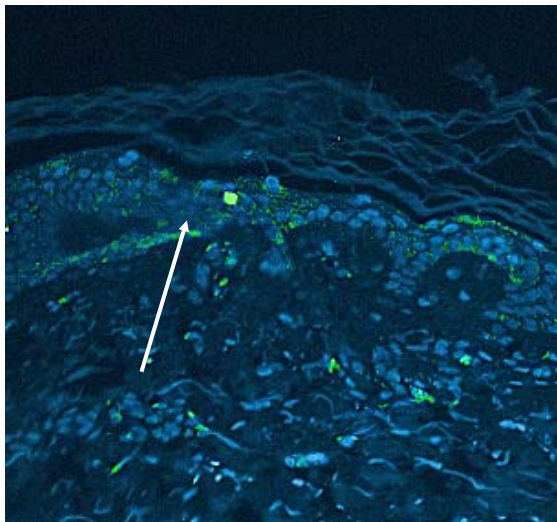

**C**

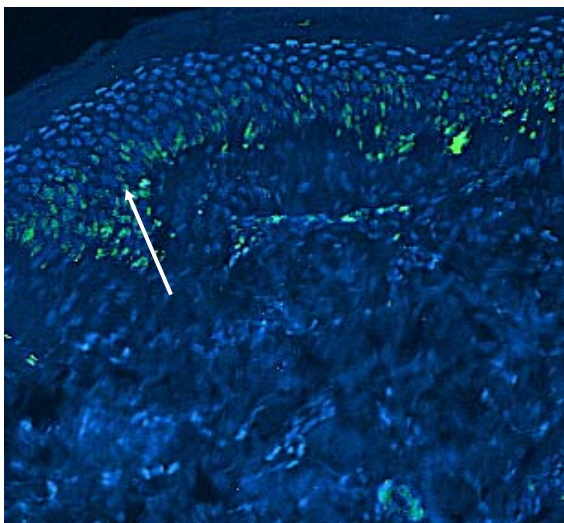

**D**

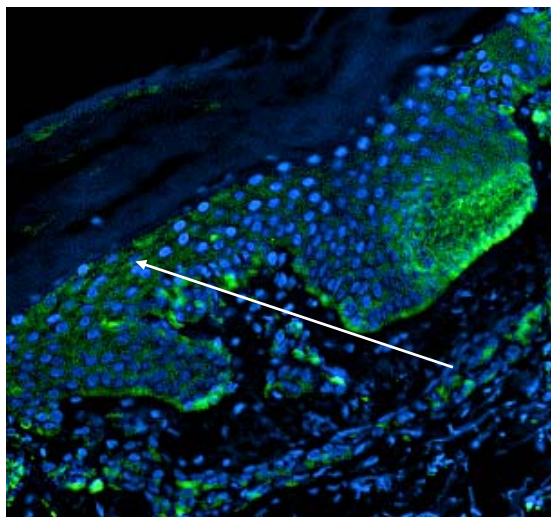

Supplement: mmc2.pdf [file mmc2.pdf]

**A**

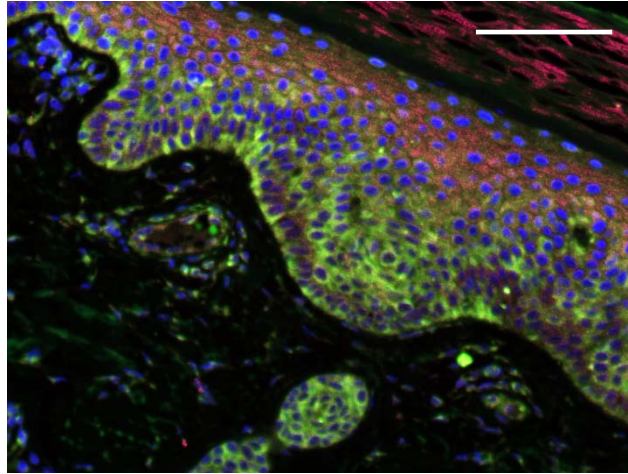

**B**

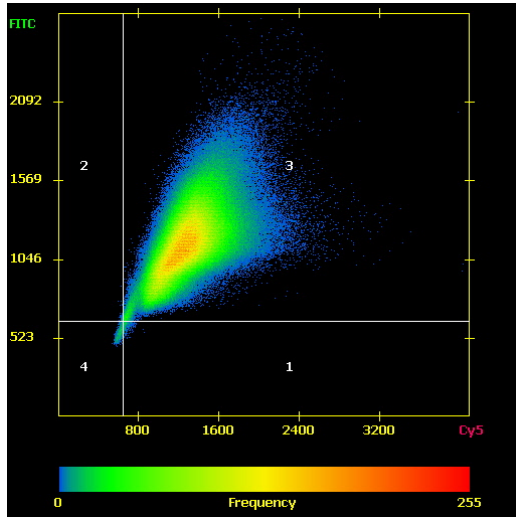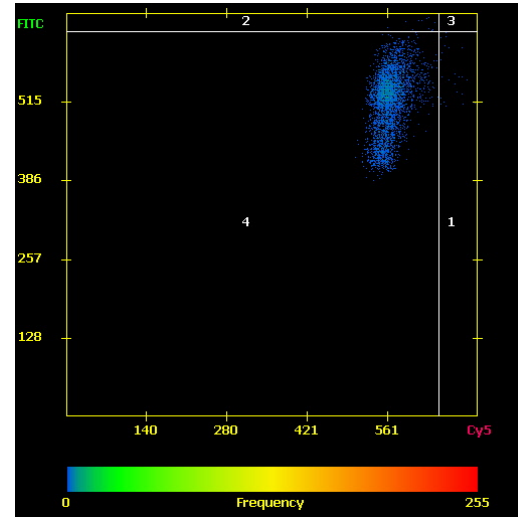

Supplement: mmc3.pdf [file mmc3.pdf]

**A**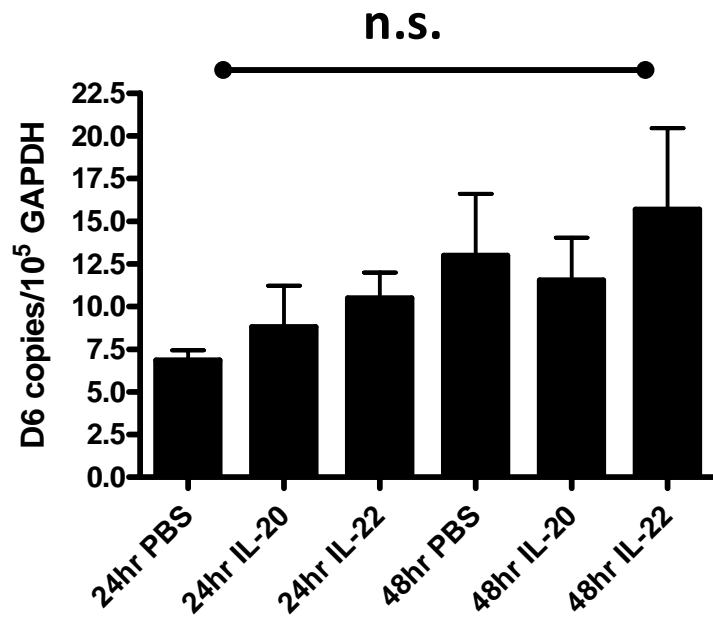**B**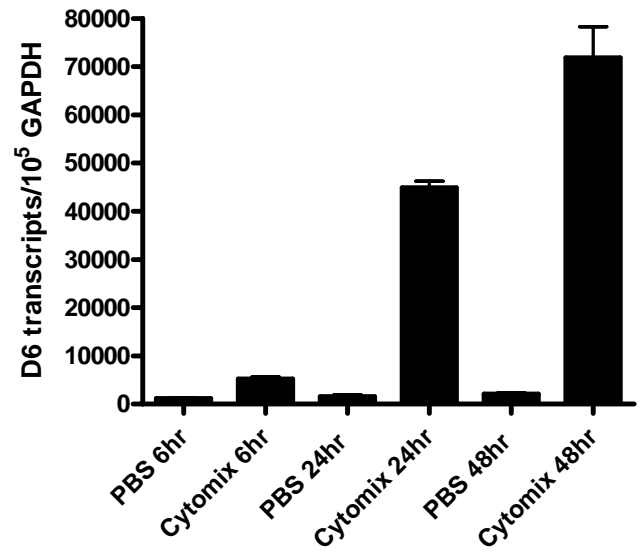

Supplement: mmc4.pdf [file mmc4.pdf]
